# Supplementary material for: Suburban Road Networks to Explore COVID-19 Vulnerability and Severity
Source: MDPI journal article supplement (doi:10.3390/ijerph19042039), 2022-02-11
Supplement: s1 [file s1]

# Supplementary Materials

**Table S1.** Socio-demographic information of 137 postal areas [30]. Data were extracted at the postcode level.

| Data Item                                       | Minimum | Maximum | Average   |
|-------------------------------------------------|---------|---------|-----------|
| Population                                      | 225     | 105,451 | 22,185.25 |
| Median age                                      | 24      | 48      | 35.66     |
| Gender (male)                                   | 44.70   | 66.20   | 49.68     |
| Population per household                        | 2.00    | 3.70    | 2.90      |
| Median weekly income                            | 785     | 2693    | 1727.88   |
| Education (% of University graduate)            | 2.90    | 60.00   | 19.49     |
| % of population born in Australia               | 23.20   | 83.70   | 54.79     |
| Unemployment rate (%)                           | 3.30    | 20.80   | 6.55      |
| Tenure information (% of the population rented) | 7.90    | 86.30   | 34.69     |

## S1. Centrality Measures

### Degree Centrality

$$C_D(u) = \frac{d_i}{(N - 1)} \quad (1)$$

Where  $d_i$  is the degree of node  $u$ , and  $N$  is the number of nodes in the network [31].

### Closeness Centrality

$$C_c(u) = \frac{N - 1}{\sum_{v \in N} d(u, v)} \quad (2)$$

Where,  $N$  is the set of nodes in the network and  $d(u, v)$  is the shortest path length between  $u$  and  $v$  [31].

### Betweenness Centrality

$$C_b(u) = \sum_{s \neq v \neq t} \frac{\sigma_{st}(u)}{\sigma_{st}} \quad (3)$$

Where  $\sigma_{st}(u)$  is the number of shortest paths between  $s$  and  $t$  that contain  $u$ , and  $\sigma_{st}$  is the shortest paths between  $s$  and  $t$  other than  $u$  [31].

### Eigenvector Centrality

$$x_u = \frac{1}{\lambda} \sum_{v \in M(u)} x_v \quad (4)$$

Where  $v \in M(u)$  is the sum of  $u$  such that  $u$  and  $v$  are connected, and  $\lambda$  is a constant [31].

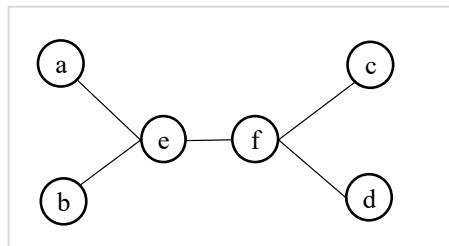

**Figure S1.** A network consists of five edges and six nodes.

Using formula 1, the degree values for different nodes of Figure S1 are:

$$\text{Degree(a)} = \text{Degree(b)} = \text{Degree(c)} = \text{Degree(d)} = \frac{1}{6-1} = 0.200$$

$$\text{Degree(e)} = \text{Degree(f)} = \frac{3}{6-1} = 0.600$$

Using formula 2, the closeness values for different nodes of Figure S1 are:

$$\text{Closeness(a)} = \text{Closeness(b)} = \text{Closeness(c)} = \text{Closeness(d)} = \frac{6-1}{1+2+2+3+3} = 0.455$$

$$\text{Closeness(e)} = \text{Closeness(f)} = \frac{6-1}{1+1+1+2+2} = 0.714$$

Using formula 3, the betweenness values for different nodes of Figure S1 are:

$$\text{Betweenness(a)} = \text{Betweenness(b)} = \text{Betweenness(c)} = \text{Betweenness(d)} = 0$$

*[Since, these nodes do not fall in the shortest paths of any other pair of nodes]*

$$\text{Betweenness(e)} = \text{Betweenness(f)} = \frac{4+3+0+0}{4+3+2+1} = 0.700$$

*[For the betweenness centrality of node e: there are 10 shortest paths between other pairs of nodes of the network. Out of these 10 shortest paths, 7 of them contain node e. They are: aeb, aef, aefc, aefd, bef, befc and befd]*

Using formula 4, the eigenvector values for different nodes of Figure S1 can be calculated by following multiple iterations:

Step 1: Calculate non-normalised degree values of different nodes (1, 3, 1, 1, 3 and 1)

Step 2: Calculate a normalised constant, C

$$c = \sqrt{1^2 + 3^2 + 1^2 + 1^2 + 3^2 + 1^2} = \sqrt{22} = 4.69$$

Step 3: Update degree values from Step 1 by dividing each of them with 4.69 to get a modified list of degree values:

$$\frac{1}{4.69}, \frac{3}{4.69}, \frac{1}{4.69}, \frac{1}{4.69}, \frac{3}{4.69}, \frac{1}{4.69}$$

Step 4: Repeat steps 2-3 until the value for C will converse (multiple iterations)

By following the above steps, we found that:

$$\text{Eigenvector(a)} = \text{Eigenvector(b)} = \text{Eigenvector(c)} = \text{Eigenvector(d)} = 0.408$$

$$\text{Eigenvector(e)} = \text{Eigenvector(f)} = 0.816$$

## S2. Core-periphery Analysis

In a network, core nodes are those that have more connections with the remaining network nodes. On the other side, peripheral nodes are sparsely connections within network [31]. To get the core-periphery classification of nodes, we first need to remove nodes with a degree value of 0 ( $k = 0$ ). Then, nodes with a degree value of 1 ( $k = 1$ ) need to

be removed and so on. For  $k = 1$ , the corresponding core-periphery structure of Figure S1 is presented in Figure S2 (core nodes are shaded).

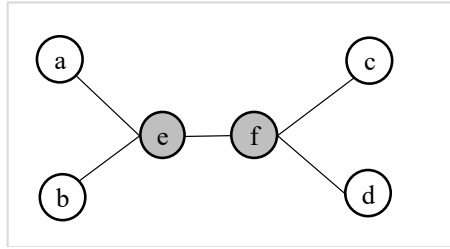

**Figure S2.** The corresponding core-periphery structure of the network in Figure S1. The core nodes are e and f (shaded ones), and the peripheral nodes are a, b, c and d.
